# Supplementary material
Source: PubMed Central journal article supplement (PMC521955)

**Control**

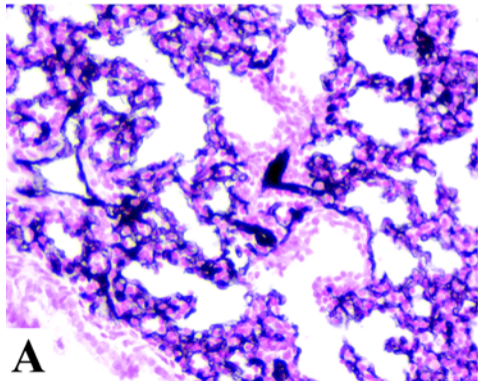

**Foxa2<sup>Δ/Δ</sup>**

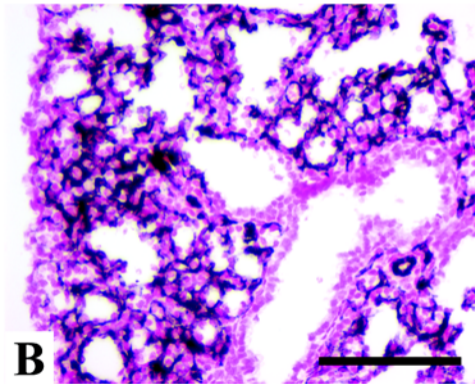

Supplement: pnas_101_40_14449__2.pdf [file pnas_101_40_14449__2.pdf]

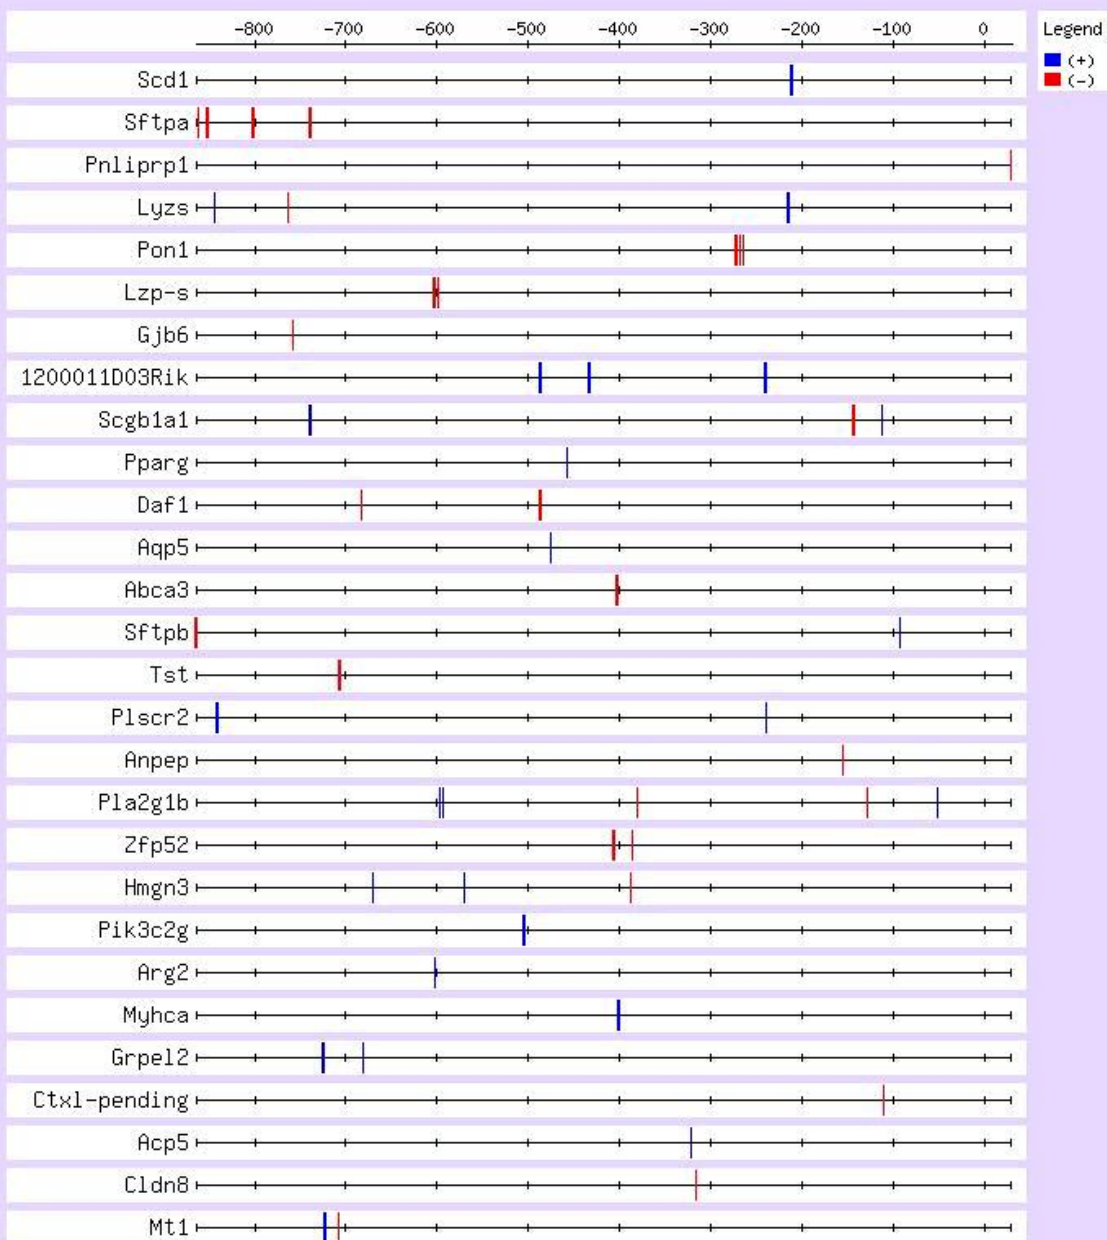

Supplement: pnas_101_40_14449__4.pdf [file pnas_101_40_14449__4.pdf]

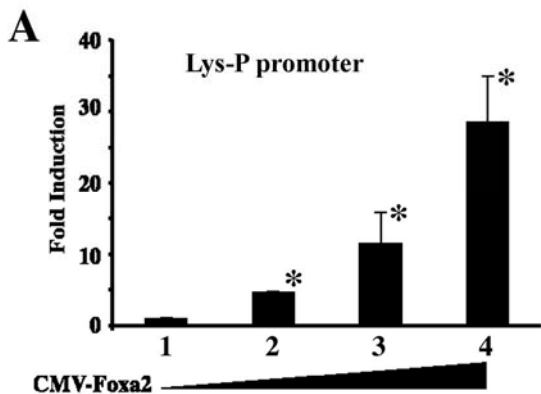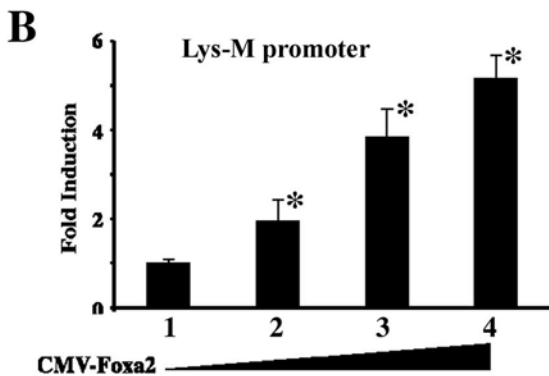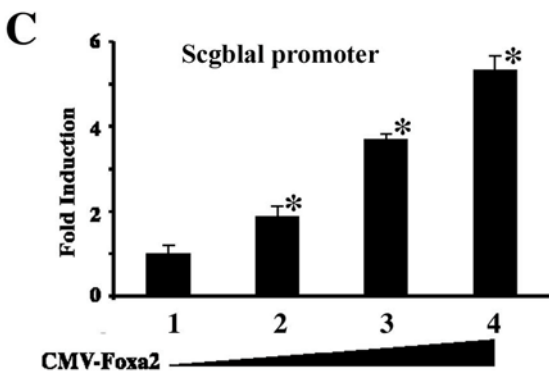

Supplement: pnas_101_40_14449__5.pdf [file pnas_101_40_14449__5.pdf]
